# Supplementary material for: AcroVoice: eliciting the patients’ perspective on acromegaly disease activity
Source: Springer Nature journal article supplement (doi:10.1007/s11102-018-00933-9), 2019-01-09
Supplement: MOESM1 [file 16387810]

## Appendices

### Appendix A: Sample choice tasks

- Below is a patient profile with descriptions for each of the 5 characteristics.
- Take your time and review the patient's profile carefully. Choose by clicking the appropriate button, depending on whether you believe:

- A) The patient is doing well and a change in treatment is not required,
- B) The patient should consider seeing a doctor as a change in treatment might be needed, or
- C) The patient needs to see a doctor as a change in treatment is required.

| Health-Related Characteristic | Patient Description                  |
|-------------------------------|--------------------------------------|
| <u>IGF-1 Levels</u>           | Slightly elevated above normal range |
| <u>Related Conditions</u>     | Normal                               |
| <u>Symptoms</u>               | Moderate                             |
| <u>Quality of Life</u>        | No or minimal impairment             |
| <u>Tumor Size</u>             | Slight increase in size              |

  


Change in treatment is not required

Change in treatment might be needed

Change in treatment is required

Figure A-1 Example of Single-profile choice task

- Below are two patient profiles with different characteristics. Please assume that everything else about the patients is exactly the same.
- Take your time and review each profile carefully. Choose the patient that you believe is doing **better** by clicking the button at the bottom of the screen under Patient A or Patient B.

| Characteristic                         | Patient A                                 | Patient B                                  |
|----------------------------------------|-------------------------------------------|--------------------------------------------|
| IGF-1 Levels                           | Significantly elevated above normal range | Within normal limits                       |
| Related Conditions                     | Moderate                                  | Normal                                     |
| Symptoms                               | Severe                                    | None or mild                               |
| Quality of Life                        | Moderate impairment                       | Significant impairment                     |
| Tumor Size                             | Slight increase in size                   | Significant increase in size or has spread |
| Which patient is doing <b>better</b> ? | <input type="radio"/>                     | <input type="radio"/>                      |

Figure A-2 Example of a Double-profile DCE task

## Appendix B: Single-profile and double-profile DCE results tables

Table B-1 Single-profile choice task overall frequency and output of multivariable model assessing choices for [Stable] vs [Mild Disease Activity or Significant Disease Activity]

| Disease parameter                | Participant Assessment of presence of disease activity:<br>Stable vs any disease Activity (M-DA or S-DA) |              |                                                      |               |         |
|----------------------------------|----------------------------------------------------------------------------------------------------------|--------------|------------------------------------------------------|---------------|---------|
|                                  | Frequency of selection                                                                                   |              | Multivariable model<br>(Stable is reference outcome) |               |         |
|                                  | Stable                                                                                                   | M-DA or S-DA | OR                                                   | 95% CI        | P-value |
| IGF-I                            |                                                                                                          |              |                                                      |               |         |
| Normal                           | 25.3% (152)                                                                                              | 74.7% (448)  | (Ref)                                                | (Ref)         | (Ref)   |
| Slightly elevated                | 9.3% (70)                                                                                                | 90.7% (680)  | 3.00                                                 | (2.07, 4.35)  | <.0001  |
| Significantly elevated           | 6.5% (42)                                                                                                | 93.5% (608)  | 7.74                                                 | (4.24, 14.14) | <.0001  |
| Tumor size                       |                                                                                                          |              |                                                      |               |         |
| No change                        | 24.5% (159)                                                                                              | 75.5% (491)  | (Ref)                                                | (Ref)         | (Ref)   |
| Slight increase                  | 12.0% (72)                                                                                               | 88.0% (528)  | 2.94                                                 | (2.04, 4.23)  | <.0001  |
| Significant increase             | 4.4% (33)                                                                                                | 95.6% (717)  | 10.82                                                | (5.46, 21.43) | <.0001  |
| Signs and symptoms <sup>a</sup>  |                                                                                                          |              |                                                      |               |         |
| None or mild                     | 18.7% (140)                                                                                              | 81.3% (610)  | (Ref)                                                | (Ref)         | (Ref)   |
| Moderate                         | 12.9% (90)                                                                                               | 87.1% (610)  | 2.36                                                 | (1.59, 3.50)  | <.0001  |
| Severe                           | 6.2% (34)                                                                                                | 93.8% (516)  | 5.74                                                 | (3.18, 10.35) | <.0001  |
| Comorbid conditions <sup>a</sup> |                                                                                                          |              |                                                      |               |         |
| None or mild                     | 15.3% (92)                                                                                               | 84.7% (508)  | (Ref)                                                | (Ref)         | (Ref)   |
| Moderate                         | 15.7% (118)                                                                                              | 84.3% (632)  | 1.49*                                                | (1.06, 2.08)  | 0.0219  |
| Severe                           | 8.3% (54)                                                                                                | 91.7% (596)  | 4.11*                                                | (2.82, 5.99)  | <.0001  |
| Quality of Life                  |                                                                                                          |              |                                                      |               |         |
| No or minimal impairment         | 11.2% (84)                                                                                               | 88.8% (666)  | (Ref)                                                | (Ref)         | (Ref)   |
| Mild to moderate impairment      | 17.2% (129)                                                                                              | 82.8% (621)  | 1.09*                                                | (0.75, 1.57)  | 0.6500  |
| Significant impairment           | 10.2% (51)                                                                                               | 89.8% (449)  | 1.83*                                                | (1.09, 3.05)  | 0.0215  |

Abbreviations: M-DA – Mild Disease Activity; S-DA – Severe Disease Activity, OR – odds ratio, Ref – Reference level.

An OR above 1 indicates that participants were more likely to choose more severe disease activity when the parameter level of interest was shown.

<sup>a</sup>The survey used patient-friendly language which described “comorbid conditions” as “related conditions” and “signs and symptoms” as “symptoms”. \*OR significantly different from the IGF-I disease parameter for the same attribute level

Table B-2 Single-profile choice task overall frequency and output of multivariable model assessing choices for [Mild Disease Activity] vs [Significant Disease Activity]

| Disease parameter                | Participant Assessment of presence of disease activity:<br>M-DA vs S-DA |             |                                                    |               |         |
|----------------------------------|-------------------------------------------------------------------------|-------------|----------------------------------------------------|---------------|---------|
|                                  | Frequency of selection                                                  |             | Multivariable model<br>(M-DA is reference outcome) |               |         |
|                                  | M-DA                                                                    | S-DA        | OR                                                 | 95% CI        | P-value |
| IGF-I                            |                                                                         |             |                                                    |               |         |
| Normal                           | 54.2% (243)                                                             | 45.8% (205) | (Ref)                                              | (Ref)         | (Ref)   |
| Slightly elevated                | 52.9% (360)                                                             | 47.1% (320) | 1.62                                               | (1.25, 2.10)  | 0.0003  |
| Significantly elevated           | 35.7% (217)                                                             | 64.3% (391) | 5.68                                               | (3.68, 8.78)  | <.0001  |
| Tumor size                       |                                                                         |             |                                                    |               |         |
| No change                        | 61.5% (302)                                                             | 38.5% (189) | (Ref)                                              | (Ref)         | (Ref)   |
| Slight increase                  | 59.1% (312)                                                             | 40.9% (216) | 1.55                                               | (1.17, 2.06)  | 0.0025  |
| Significant increase             | 28.7% (206)                                                             | 71.3% (511) | 10.19*                                             | (6.60, 15.75) | <.0001  |
| Signs and symptoms <sup>a</sup>  |                                                                         |             |                                                    |               |         |
| None or mild                     | 47.5% (290)                                                             | 52.5% (320) | (Ref)                                              | (Ref)         | (Ref)   |
| Moderate                         | 55.1% (336)                                                             | 44.9% (274) | 1.42                                               | (1.04, 1.95)  | 0.0294  |
| Severe                           | 37.6% (194)                                                             | 62.4% (322) | 3.88                                               | (2.81, 5.38)  | <.0001  |
| Comorbid conditions <sup>a</sup> |                                                                         |             |                                                    |               |         |
| None or mild                     | 58.7% (298)                                                             | 41.3% (210) | (Ref)                                              | (Ref)         | (Ref)   |
| Moderate                         | 43.2% (273)                                                             | 56.8% (359) | 1.21                                               | (0.92, 1.58)  | 0.1719  |
| Severe                           | 41.8% (249)                                                             | 58.2% (347) | 2.71*                                              | (1.99, 3.70)  | <.0001  |
| Quality of Life                  |                                                                         |             |                                                    |               |         |
| No or minimal impairment         | 56.9% (379)                                                             | 43.1% (287) | (Ref)                                              | (Ref)         | (Ref)   |
| Mild to moderate impairment      | 45.1% (280)                                                             | 54.9% (341) | 1.23                                               | (0.98, 1.55)  | 0.0761  |
| Significant impairment           | 35.9% (161)                                                             | 64.1% (288) | 2.65*                                              | (1.95, 3.59)  | <.0001  |

Abbreviations: M-DA – Mild Disease Activity; S-DA – Severe Disease Activity, OR – odds ratio, Ref – Reference level.

An OR above 1 indicates that participants were more likely to choose more severe disease activity when the parameter level of interest was shown.

<sup>a</sup>The survey used patient-friendly language which described “comorbid conditions” as “related conditions” and “signs and symptoms” as “symptoms”. \*OR significantly different from the IGF-I disease parameter for the same attribute level

Table B-3 Double-profile DCE choice results for the conditional logistic model

|                                                           | Conditional logistic model |              |         |
|-----------------------------------------------------------|----------------------------|--------------|---------|
|                                                           | OR                         | CI           | P-value |
| IGF-I levels (reference: normal range)                    |                            |              |         |
| Slightly elevated                                         | 0.74                       | (0.63, 0.87) | <0.01   |
| Significantly elevated                                    | 0.30                       | (0.23, 0.39) | <0.01   |
| Tumor size (reference: no change)                         |                            |              |         |
| Slight increase                                           | 0.73                       | (0.63, 0.86) | <0.01   |
| Significant increase                                      | 0.29                       | (0.22, 0.40) | <0.01   |
| Signs and symptoms (reference: none or mild) <sup>a</sup> |                            |              |         |
| Moderate symptoms                                         | 0.64                       | (0.55, 0.75) | <0.01   |
| Severe symptoms                                           | 0.36                       | (0.28, 0.47) | <0.01   |
| Comorbid conditions (reference: normal) <sup>a</sup>      |                            |              |         |
| Moderate                                                  | 0.95*                      | (0.82, 1.09) | 0.42    |
| Severe                                                    | 0.48*                      | (0.38, 0.60) | <0.01   |
| Quality of Life (reference: no or mild impairment)        |                            |              |         |
| Moderate impairment                                       | 0.62                       | (0.53, 0.73) | <0.01   |
| Significant impairment                                    | 0.32                       | (0.25, 0.40) | <0.01   |

Abbreviations: CI – 95% confidence interval; IGF-I – insulin-like growth factor 1; QoL – quality of life

An OR below 1 indicates that participants were less likely to choose a patient profile as representing the better health stat than when the parameter level of interest was shown compared to the reference level of that parameter.

<sup>a</sup> The survey used patient-friendly language which described “comorbid conditions” as “related conditions” and “signs and symptoms” as “symptoms”.

\*OR significantly different from the IGF-I Disease parameter for the same attribute level.
